# Supplementary material for: Phenotypes to remember: Evolutionary developmental memory capacity and robustness
Source: PubMed Central journal article supplement (PMC7703877; doi:10.1371/journal.pcbi.1008425), 2020-11-30
Supplement: pcbi.1008425.s001.pdf [file pcbi.1008425.s001.pdf]

# PLOS Computational Biology

## Phenotypes to remember: Evolutionary developmental memory capacity and robustness --Manuscript Draft--

|                                                                                                                                                                                                                                                                                                                                                                                                                                                                                                                |                                                                                                                                                                                                                                                                                                                                                                                                                                                                                                                                                                                                                                                                                                                                                                                                                                                                                                                                                        |
|----------------------------------------------------------------------------------------------------------------------------------------------------------------------------------------------------------------------------------------------------------------------------------------------------------------------------------------------------------------------------------------------------------------------------------------------------------------------------------------------------------------|--------------------------------------------------------------------------------------------------------------------------------------------------------------------------------------------------------------------------------------------------------------------------------------------------------------------------------------------------------------------------------------------------------------------------------------------------------------------------------------------------------------------------------------------------------------------------------------------------------------------------------------------------------------------------------------------------------------------------------------------------------------------------------------------------------------------------------------------------------------------------------------------------------------------------------------------------------|
| <b>Manuscript Number:</b>                                                                                                                                                                                                                                                                                                                                                                                                                                                                                      | PCOMPBIOL-D-20-00996                                                                                                                                                                                                                                                                                                                                                                                                                                                                                                                                                                                                                                                                                                                                                                                                                                                                                                                                   |
| <b>Full Title:</b>                                                                                                                                                                                                                                                                                                                                                                                                                                                                                             | Phenotypes to remember: Evolutionary developmental memory capacity and robustness                                                                                                                                                                                                                                                                                                                                                                                                                                                                                                                                                                                                                                                                                                                                                                                                                                                                      |
| <b>Short Title:</b>                                                                                                                                                                                                                                                                                                                                                                                                                                                                                            | Phenotypes to remember: Evolutionary developmental memory capacity and robustness                                                                                                                                                                                                                                                                                                                                                                                                                                                                                                                                                                                                                                                                                                                                                                                                                                                                      |
| <b>Article Type:</b>                                                                                                                                                                                                                                                                                                                                                                                                                                                                                           | Research Article                                                                                                                                                                                                                                                                                                                                                                                                                                                                                                                                                                                                                                                                                                                                                                                                                                                                                                                                       |
| <b>Keywords:</b>                                                                                                                                                                                                                                                                                                                                                                                                                                                                                               | gene regulatory network; associative neural networks, evolution; learning; evo-devo                                                                                                                                                                                                                                                                                                                                                                                                                                                                                                                                                                                                                                                                                                                                                                                                                                                                    |
| <b>Abstract:</b>                                                                                                                                                                                                                                                                                                                                                                                                                                                                                               | <p>There is increased awareness of the possibility of developmental memories resulting from evolutionary learning. Genetic regulatory and neural networks can be modelled by analogous formalism raising the important question of productive analogies in principles, processes and performance. We investigate the formation and persistence of various developmental memories of past phenotypes asking how the number of remembered past phenotypes scales with network size, to what extent memories stored form by Hebbian-like rules, and how robust these developmental “devo-engrams” are against networks perturbations (graceful degradation). The analogy between neural and genetic regulatory networks is not superficial in that it allows knowledge transfer between fields that used to be developed separately from each other. Known examples of spectacular phenotypic radiations could partly be accounted for in such terms.</p> |
| <b>Additional Information:</b>                                                                                                                                                                                                                                                                                                                                                                                                                                                                                 |                                                                                                                                                                                                                                                                                                                                                                                                                                                                                                                                                                                                                                                                                                                                                                                                                                                                                                                                                        |
| <b>Question</b>                                                                                                                                                                                                                                                                                                                                                                                                                                                                                                | <b>Response</b>                                                                                                                                                                                                                                                                                                                                                                                                                                                                                                                                                                                                                                                                                                                                                                                                                                                                                                                                        |
| <b>Financial Disclosure</b><br><br>Enter a financial disclosure statement that describes the sources of funding for the work included in this submission. Review the <a href="#">submission guidelines</a> for detailed requirements. View published research articles from <a href="#">PLOS Computational Biology</a> for specific examples.<br><br>This statement is required for submission and <b>will appear in the published article</b> if the submission is accepted. Please make sure it is accurate. | <p>YES</p> <p>A.S. and E.S. are supported by the National Research, Development and Innovation Office (NKFIH) under OTKA grant numbers K124438 (A.S.), K119347 (E.S. and A.S.) and GINOP-2.3.2-15-2016-00057 (E.S., P.S. and A.S.) research grants; A.S. was supported by the Bolyai János Research Fellowship of the Hungarian Academy of Sciences and the ÚNKP-19-4 New National Excellence Program of the Ministry of Human Capacities. M.S. is supported by the MTA Distinguished Guest Fellowship Programme in Hungary. All authors are supported by Templeton Foundation under grant number TWCF0268 (“Learning in evolution, evolution in learning”).</p>                                                                                                                                                                                                                                                                                       |

**Unfunded studies**

Enter: *The author(s) received no specific funding for this work.*

**Funded studies**

Enter a statement with the following details:

- Initials of the authors who received each award
- Grant numbers awarded to each author
- The full name of each funder
- URL of each funder website
- Did the sponsors or funders play any role in the study design, data collection and analysis, decision to publish, or preparation of the manuscript?
- **NO** - Include this sentence at the end of your statement: *The funders had no role in study design, data collection and analysis, decision to publish, or preparation of the manuscript.*
- **YES** - Specify the role(s) played.

\* typeset

**Competing Interests**

Use the instructions below to enter a competing interest statement for this submission. On behalf of all authors, disclose any [competing interests](#) that could be perceived to bias this work—acknowledging all financial support and any other relevant financial or non-financial competing interests.

This statement **will appear in the published article** if the submission is accepted. Please make sure it is accurate. View published research articles from [PLOS Computational Biology](#) for specific examples.

The authors have declared that no competing interests exist.

**NO authors have competing interests**

Enter: *The authors have declared that no competing interests exist.*

**Authors with competing interests**

Enter competing interest details beginning with this statement:

*I have read the journal's policy and the authors of this manuscript have the following competing interests: [insert competing interests here]*

\* typeset

**Data Availability**

Yes - all data are fully available without restriction

Authors are required to make all data underlying the findings described fully available, without restriction, and from the time of publication. PLOS allows rare exceptions to address legal and ethical concerns. See the [PLOS Data Policy](#) and [FAQ](#) for detailed information.

A Data Availability Statement describing where the data can be found is required at submission. Your answers to this question constitute the Data Availability Statement and **will be published in the article**, if accepted.

**Important:** Stating 'data available on request from the author' is not sufficient. If your data are only available upon request, select 'No' for the first question and explain your exceptional situation in the text box.

Do the authors confirm that all data underlying the findings described in their manuscript are fully available without restriction?

**Describe where the data may be found in full sentences. If you are copying our sample text, replace any instances of XXX with the appropriate details.**

All relevant data are within the manuscript and its Supporting Information files.

- If the data are **held or will be held in a public repository**, include URLs, accession numbers or DOIs. If this information will only be available after acceptance, indicate this by ticking the box below. For example: *All **XXX** files are available from the **XXX** database (accession number(s) **XXX**, **XXX**).*
- If the data are all contained **within the manuscript and/or Supporting Information files**, enter the following: *All relevant data are within the manuscript and its Supporting Information files.*
- If neither of these applies but you are able to provide **details of access elsewhere**, with or without limitations, please do so. For example:

*Data cannot be shared publicly because of **[XXX]**. Data are available from the **XXX** Institutional Data Access / Ethics Committee (contact via **XXX**) for researchers who meet the criteria for access to confidential data.*

*The data underlying the results presented in the study are available from (include the name of the third party and contact information or URL).*

- This text is appropriate if the data are owned by a third party and authors do not have permission to share the data.

\* typeset

Additional data availability information:

Tick here if the URLs/accession numbers/DOIs will be available only after acceptance of the manuscript for publication so that we can ensure their inclusion before publication.

# Phenotypes to remember: Evolutionary developmental memory capacity and robustness

András Szilágyi<sup>1,2,3</sup>, Péter Szabó<sup>1,4</sup>, Mauro Santos<sup>2,5</sup> and Eörs Szathmáry<sup>1,2,3\*</sup>.

<sup>1</sup> Institute of Evolution, Centre for Ecological Research, 8237 Tihany, Hungary.

<sup>2</sup> Department of Plant Systematics, Ecology and Theoretical Biology, Eötvös Loránd University, 1117 Budapest, Hungary.

<sup>3</sup> Center for the Conceptual Foundations of Science, Parmenides Foundation, 82049 Pullach/Munich, Germany.

<sup>4</sup> Department of Ecology, Institute for Biology, University of Veterinary Medicine Budapest, 1078 Budapest, Hungary.

<sup>5</sup> Department de Genètica i de Microbiologia, Grup de Genòmica, Bioinformàtica i Biologia Evolutiva (GBBE), Universitat Autònoma de Barcelona, 08193 Bellaterra (Barcelona), Spain.

\*Corresponding author

[szathmary.eors@gmail.com](mailto:szathmary.eors@gmail.com) (ES)

All authors contributed equally to this work.

## 1 **Abstract**

2 There is increased awareness of the possibility of developmental memories resulting from  
3 evolutionary learning. Genetic regulatory and neural networks can be modelled by analogous  
4 formalism raising the important question of productive analogies in principles, processes and  
5 performance. We investigate the formation and persistence of various developmental memories of  
6 past phenotypes asking how the number of remembered past phenotypes scales with network size,  
7 to what extent memories stored form by Hebbian-like rules, and how robust these developmental  
8 “devo-engrams” are against networks perturbations (graceful degradation). The analogy between  
9 neural and genetic regulatory networks is not superficial in that it allows knowledge transfer  
10 between fields that used to be developed separately from each other. Known examples of  
11 spectacular phenotypic radiations could partly be accounted for in such terms.

## 12 Introduction

13 Alan Turing, the father of machine learning, also formulated one of the most important  
14 mathematical models in developmental biology: the reaction-diffusion model for pattern  
15 generation [1]. This is striking because only recently a conceptual analogy between evolutionary  
16 developmental processes and artificial neural network-based learning models has been articulated  
17 [2]. Since development is the process whereby the phenotype is specified by the evolving genotype,  
18 late-evolved morphologies or functional capacities retain aspects of earlier stages (“memory”) that  
19 were likely shaped by natural selection. These earlier stages might become reactivated if they are  
20 again useful in a different or a changing environment [3]. In this formulation **evolutionary changes**  
21 **provide no novelty**, defined as a structure that is non-homologous to an ancestral or existing one  
22 [4, 5], but allow for recursion. For instance, mimetic color patterns of an extinct morph of the  
23 butterfly *Heliconius cydno*, presumably as a result of human disturbance, can be reconstructed from  
24 wild-caught butterflies [6], meaning that the morph could recur in nature if the former conditions  
25 reappear. Also surprising is the repeatability of evolution among closely related lineages [7, 8]. An  
26 iconic textbook example is the extraordinary morphological convergence associated with  
27 adaptation to distinct ecological niches in cichlid fishes [9], with a large taxonomic diversity in the  
28 African Great Lakes Tanganyika (the oldest radiation, around 9-12 Myr ago with about 250  
29 species), Malawi (less than 0.8 Myr ago and over 700 species) and Victoria (about 700 species  
30 evolved within the past 15,000 years) [10]. 

31 The idea that developmental processes can retain a memory of past selected phenotypes  
32 [11], together with the **eerie** ability of genomes to find adaptive solutions that quickly converge  
33 upon remarkably similar states (“attractors” [12]) in closely related lineages, clearly suggests a  
34 non-linear genotype-phenotype mapping capable of producing multiple distinct phenotypes [11,

35 13]. Non-linearity is also the hallmark of reaction-diffusion (Turing) and signaling systems  
36 involved in patterning processes [14], and developmental evolutionary biology (evo-devo) views  
37 the genotype-phenotype mapping as highly non-linear [15, 16]. Furthermore, it might not be  
38 farfetched to think of some sort of developmental memory in the cichlid adaptive radiation. The  
39 explosive diversification in Lake Victoria was predated by an ancient admixture between two  
40 distantly related riverine lineages, one from the Upper Congo and one from the Upper Nile drainage  
41 [17]. Many phenotypic traits known to contribute to the adaptation of different ecological niches  
42 in the Lake Victoria radiation are also divergent between the riverine species [18, 19]. Thus, when  
43 referring to the anatomical and morphological variation of Haplochromine cichlids, which are at  
44 the origin of the Lake Victoria radiation [17], Greenwood writes [19, p. 266]: “It is amongst the  
45 species of these various lacustrine flocks that one encounters the great range of anatomical, dental  
46 and morphological differentiation usually associated with the genus. The fluviatile species appear  
47 to be less diversified, but even here there is more diversity than is realized at first.” If the high  
48 diversity in the Haplochromine cichlids of Lake Victoria is, to some extent, the result of re-evolved  
49 (similar) phenotypes in the ancestral fluviatile lineages, then the enduring question of why such an  
50 explosive diversification happened within a short time interval might have a simpler solution than  
51 previously thought. We aim here to sketch what the solution could be.

52         The genomic program for development operates primarily by the regulatory inputs and  
53 functional outputs of control genes that constitute network-like architectures [20], which are  
54 mathematically equivalent to artificial neural networks [21, 22]. Although the insights of  
55 Vohradsky [21, 22] and Watson et al. [11] shed light on an important analogy between neural and  
56 genetic regulatory networks, the conclusion of the theory of autoassociative networks cannot yet  
57 be readily extended to developmental systems. This is because of the different state space  
58 representations, as well as the nature of the task to be solved. Models of autoassociative networks



59 tend to work with positive/negative state variables (inherited from ferromagnetic systems,   
60 contrast to this, in ontogenetic systems the relevant space is that of nonnegative real numbers,  
61 corresponding to concentrations of different molecules. Due to the nonlinear activation function  
62 features of models working with the above mentioned, alternative state representations can  
63 markedly differ. Another important consideration is that autoassociative networks (as their name  
64 indicates) solve the problem of the recovery of a particular state (attractor property). During  
65 ontogeny we require something more: not only should the adult stage be stable, but the system  
66 should reach this state from a particular embryo state (heteroassociative property). It can easily  
67 happen that one has to find a solution to a problem of the transition from multiple embryo states  
68 and the corresponding adult states. In short, we require networks that solve problems of  
69 auto/heteroassociativity in one, as we model here.

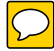

70

## 71 **Methods**

### 72 **Developmental model**

73 Our model is a formal description of ontogenetic development operating primarily by the  
74 regulatory inputs and functional outputs of control genes. Consider an organism with  $N$  genes. Its  
75 developmental state at time  $t$ , expressed by its gene product composition (e.g., proteins), can be  
76 represented by the vector  $\mathbf{p}(t) = (p_1, p_2, \dots, p_N)^T$  with each element being the quantity of the  
77 product of a gene. These quantities are assumed to change due to protein decay and gene expression  
78 processes. Following [11], the ontogenetic dynamics of the developmental state can be described  
79 by the difference equation

$$p_i(t + 1) = (1 - \delta)p_i(t) + \tau f([\mathbf{M}\mathbf{p}(t)]_i), \quad (1)$$

80 where  $\tau$  denotes the decay rate,  $\tau$  denotes the maximal gene expression rate,  $f(\cdot)$  is the activation  
81 function, and the matrix  $\mathbf{M}$  stands for the regulatory network. An  $m_{ij}$  entry of the matrix gives the  
82 regulatory effect of the product of gene  $j$  on the expression level of gene  $i$ ; positive and negative  
83 elements imply activation and inhibition, respectively. The cumulative regulatory effects on any  
84 single gene  $i$ , i.e. the  $i$ th element of the product  $\mathbf{M}\mathbf{p}$ , determine the gene expressions via a sigmoid  
85 activation function modelled here as  $f(x) = (1 + \tanh(\omega x))/2$ , where  $\omega$  is the slope parameter.

86 From an ontogenetic viewpoint, the **task** of the gene regulatory network is to guide the  
87 individual along a developmental pathway from an initial embryonic state  $\mathbf{p}(0) = \mathbf{e}$  to a specific  
88 adult state  $\mathbf{p}(T) \rightarrow \mathbf{a}$ . In real systems, an ensemble of different developmental pathways is desired,  
89 each responsible for achieving some environment-specific adult state from a particular embryonic  
90 state. We used  $T = 150$  iteration to reach **the steady state.**

91

## 92 **Evolutionary model**

93 In the evolutionary model we considered a population of  $K$  individuals, with each member  
94 of the population represented by its regulatory matrix. All the interaction matrix elements were  
95 zero initially, representing an undeveloped regulation. Every individual shared the same  
96 environment. We assumed  **$Q = 3$  number of different selective environments, each defining an**  
97 **embryonic state  $\mathbf{e}^{(q)}$  and a corresponding adapted adult state  $\mathbf{a}^{(q)}$ .** The selective environments  
98 alternated randomly; if the average fitness of the population approached the optimum ( $\bar{w} > 0.95$   
99 for at least 20 consecutive generations), or after 10000 generations, a new environment was chosen  
100 at random. In each generation the individuals underwent mutation, development and selection steps  
101 as follows.

102 Mutation: The mutation of the regulation network was implemented by adding a normally  
 103 distributed random value, with zero mean and  $\mu_W$  variance, to a randomly selected matrix element.  
 104 Matrix elements were clipped into the range  $[-1,1]$ .

105 Development: We **got** the equilibrium, adult state of each member of the population by  
 106 iterating Eq. (1).

107 Selection: The fitness of individual  $k$  was expressed by a similarity index derived from the  
 108 Euclidean distance between the actual adult state  $\mathbf{p}(T)$  and the environment-specific  optimal adult  
 109 phenotype  $\mathbf{a}^{(q)}$  as

$$w_k = 1 - \sqrt{\sum_{n=1}^N \left[ \frac{p_n(T) - a_n^{(q)}}{\tau/\delta} \right]^2}. \quad (2)$$

110 **Then the regulatory matrix of a randomly selected individual was replaced by that of the individual**  
 111 **with the highest fitness (elitist selection).**

112 Embryonic and (optimally adapted) adult vectors: The number of genes was  $N = 100$  with  
 113 a low average expression level of  $\sigma = 0.1$ , where 40% of the expressed genes were common, 20%  
 114 were partially common, and 40% were unique in all the embryonic and all the adult vectors.  
 115 Specifically, the expression sites of the employed state vectors were

116  $\mathbf{e}_1 = \{\underline{13}, \underline{19}, \underline{32}, \overline{36}, 39, 49, 55, \underline{72}, 81, \overline{87}\}$ ,  $\mathbf{e}_2 = \{\underline{13}, \underline{19}, 31, \underline{32}, \overline{40}, 60, 62, \underline{72}, \overline{87}, 100\}$ ,

117  $\mathbf{e}_3 = \{5, \underline{13}, \underline{19}, \underline{32}, \overline{36}, \overline{40}, 47, 67, \underline{72}, 94\}$ ,  $\mathbf{a}_1 = \{\underline{6}, \overline{12}, 20, 24, \underline{46}, 65, \underline{84}, \overline{86}, 88, \underline{92}\}$ , 

118  $\mathbf{a}_2 = \{\underline{6}, 11, 28, \underline{46}, 79, \underline{84}, \overline{86}, \overline{91}, \underline{92}, 96\}$ ,  $\mathbf{a}_3 = \{\underline{6}, \overline{12}, \underline{46}, 56, 61, 66, 80, \underline{84}, \overline{91}, \underline{92}\}$ ; where  
 119 underlines and overlines denote the common and partially common elements, respectively. The  
 120 initial state was always a perturbed embryonic state. The perturbation was performed, similar to  
 121 the mutations, by adding a normally distributed random value, with zero mean and  $\mu_e$  variance, to

122 a randomly selected element of the environment-specific embryo vector. Vector elements were  
123 clipped into the range  $[0, \tau/\delta]$ .

124

## 125 **Perturbation analysis**

126 The embryo states were perturbed by flipping the vector elements from low to high, or vice  
127 versa, with the given probability. The interaction matrices were perturbed by either adding random  
128 values to all matrix elements, drawn from a normal distribution with the given standard deviation,  
129 or by nullifying a proportion of the elements. Matrix elements were clipped into the range  $[-1, 1]$ .  
130 Note that, in the evolutionary algorithm we perturbed only single elements of the embryonic states.  
131 In contrast, in the analytical matrix construction we perturbed all elements of the embryonic vectors  
132 to incorporate the accumulating effects of many consecutive perturbations on the interaction  
133 matrix.

134

## 135 **Results**

136 To perform the developmental task, the network must guarantee that (i) each adult state is  
137 a stable equilibrium point of the dynamics (stability condition), and (ii) each embryonic state is  
138 within the basin of attraction of its corresponding adult state (attraction condition); these two  
139 conditions correspond to the auto- and heteroassociative properties in a neural network [23]. Note  
140 that this is a more difficult task than a simple pattern recovery problem, which is known to be  
141 achievable by a neural network with the standard Hebbian learning rule that fulfils only the stability  
142 condition [24]. Not only must all the adult states have a basin of attraction, but these basins must  
143 include the corresponding embryonic states.

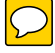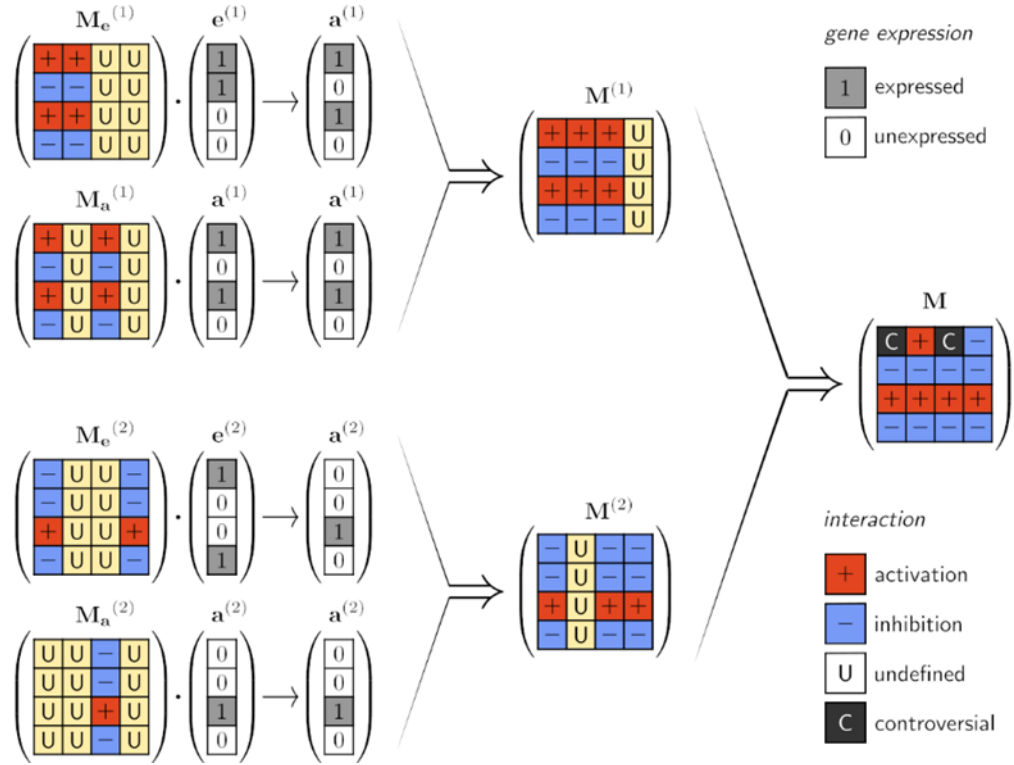

144 **Fig. 1. Illustration of the construction rules of interaction matrices based on theoretical**  
 145 **considerations on the optimal pairwise interaction types between genes.**  $e^{(1)}$  and  $a^{(1)}$  are the  
 146 first embryo-adult pair,  $e^{(2)}$  and  $a^{(2)}$  the second pair. Depending on the combination of gene  
 147 expressions  $e_i^{(n)}$  and  $a_i^{(n)}$  in an embryo-adult vector pair ( $n = 1,2$ ), an  $m_{ij}$  element of the  
 148 interaction matrix can be positive ('+', activation), negative ('-', inhibition), or undefined ('U').  
 149 To ensure correct development ( $M_e^{(n)} e^{(n)} \rightarrow a^{(n)}$ ) the  $M_e^{(n)}$  matrices must have the structure  
 150 indicated in the figure. (If  $e_j^{(n)} = 1$  and  $a_i^{(n)} = 1$ , then  $m_{ij}^{(n)} = '+'$ ; if  $e_j^{(n)} = 1$  and  $a_i^{(n)} = 0$ , then  
 151  $m_{ij}^{(n)} = '-'$ ; if  $e_j^{(n)} = 0$ , then  $m_{ij}^{(n)} = 'U'$ ; irrespective of the value of  $a_i^{(n)}$ .) A similar argument  
 152 holds for the stability criteria ( $M_a^{(n)} a^{(n)} \rightarrow a^{(n)}$ ) and results in the  $M_a^{(n)}$  matrices. By combining  
 153  $M_e^{(n)}$  and  $M_a^{(n)}$  the resulting  $M^{(n)}$  fulfills both the attractivity and stability criteria. The combination  
 154 rules are the following:  $(+, +) \rightarrow +$ ;  $(-, -) \rightarrow -$ ;  $(\pm, U) \rightarrow \pm$ ; and  $(\pm, \mp) \rightarrow C$ , which can be done  
 155 practically by taking the element-wise average of the two matrices. The ultimate combination of  
 156 all  $M^{(n)}$ s results in a matrix that fulfills the attraction and stability criteria for all different embryo-  
 157 adult pairs.

158 We found that the task-optimized structure of the regulatory network can be inferred from  
 159 the embryo-adult state vector pairs in the form of an interaction matrix  $M$  (Fig 1). Consider the  
 160 simplest case with one embryo-adult pair (i.e. one developmental pathway). Depending on whether

161 a gene is expressed in the adult state or not, all the other expressed gene products, in either the  
 162 embryonic or the adult state, must enhance or block its expression, respectively. This would  
 163 provide, on the one hand, stability for the adult state and, on the other hand, attraction from the  
 164 embryonic state. Note, however, that if a gene is expressed in neither the embryonic nor the adult  
 165 state, then its regulatory effect is irrelevant, therefore the corresponding matrix elements are  
 166 undetermined. In summary, an  $m_{ij}$  element of the regulatory matrix  $\mathbf{M}$  should be positive or  
 167 negative, depending on whether the  $i$ th gene is expressed in the adult state or not, except when the  
 168  $j$ th gene is expressed in neither the embryonic nor the adult state. The above line of thought can be  
 169 generalized for arbitrary  $Q$  number of embryo-adult state pairs. Denoting the zero-one normalized  
 170 embryonic and adult state vectors by  $\mathbf{e}$  and  $\mathbf{a}$ , such a matrix can be obtained by averaging two  
 171 dyadic products for all developmental pathways as

$$\mathbf{M} = \frac{1}{2Q} \sum_{q=1}^Q (2\hat{\mathbf{a}}^{(q)} - 1) \circ \hat{\mathbf{a}}^{(q)} + (2\hat{\mathbf{a}}^{(q)} - 1) \circ \hat{\mathbf{e}}^{(q)}, \quad (3)$$

172 where  $Q$  stands for the number of embryo-adult state pairs and  $q$  denotes the different pairs. The  
 173 first and second dyadic products are responsible for the stability and attraction conditions,  
 174 respectively. Within each dyadic product the right **argument** determines whether an entry is  
 175 relevant from the viewpoint of the state vector, whereas the left dyadic argument determines its  
 176 sign. The resulting matrix contains positive values, negative values and zeros for activator,  
 177 inhibitory and undetermined elements, respectively. Notice that the developmental pathways can  
 178 be in conflict with each other as to whether a gene should be up- or downregulated by another gene.  
 179 It is instructive to compare this formula with the standard Hebbian learning rule  $\mathbf{H} = \mathbf{a} \circ \mathbf{a}$  for  $a_i \in$   
 180  $\{-1, +1\}$ . Its modification for  $a_i \in \{0, +1\}$  vectors that preserves that stability condition is  **$\mathbf{H} =$**

181  **$(2\mathbf{a} - 1) \circ \mathbf{a}$** , which is identical to the first term in Eq. (3), c.f. Table 1.

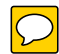

182 **Table 1. Comparison of the resulting interaction matrices for an autoassociative task with**  
 183 **the two representations.**

|                                                           | $\{-1, +1\}$ representation                       | $\{0, +1\}$ representation                                   |
|-----------------------------------------------------------|---------------------------------------------------|--------------------------------------------------------------|
| <b>learning rule</b>                                      | $H_{ij} = \sum_q a_i^{(q)} a_j^{(q)}$ (Hebb-rule) | $M_{ij} = \sum_q (2a_i^{(q)} - 1)a_j^{(q)}$                  |
| <b>symmetry</b>                                           | $H_{ij} = H_{ji}$                                 | non-symmetric                                                |
| <b>neutralities in weight matrix</b>                      | no neutral elements                               | can be neutral elements (“opposite to” zero vector elements) |
| <b>main diagonal</b>                                      | always positive (if allowed)                      | can be negative or positive                                  |
| <b>robustness against perturbation of matrix elements</b> | smaller, due to the absence of neutral elements   | larger, due to the presence of neutral elements              |
| <b>structure</b>                                          | has a unique structure                            | many different realizations                                  |

184 We investigated the parameter dependence of the analytic model. As for the regulatory  
 185 matrix we used a slightly modified version of Eq. (3). Treves [25] claims that the interaction terms  
 186 should be modified by the average expression  $\sigma$ , i.e. the proportion of expressed genes. This is  
 187 because if a larger proportion of genes is expressed, then proportionally smaller interaction  
 188 strengths are needed for the same regulatory effect on any single gene. Incorporating this  
 189 consideration into Eq. (3) gives

$$\mathbf{M} = \frac{1}{2Q} \sum_{q=1}^Q (2\hat{\mathbf{a}}^{(q)} - 1) \circ (\hat{\mathbf{a}}^{(q)} - \sigma + \hat{\mathbf{e}}^{(q)} - \sigma). \quad (4)$$

190 The performance of a regulatory network constructed by the above rule changes with the number  
 191 of developmental pathways and gene expression levels (Fig 2). With increasing number of embryo-  
 192 adult pairs, the accumulating conflicts between them inevitably corrupt the regulatory ability of the  
 193 network; some adult states will be unreachable from their embryonic states. Nevertheless, the  
 194 network is able to tolerate a fair number of conflicts, related to its structural stability. Since conflicts  
 195 can occur only between non-orthogonal state vectors, the performance of the network also depends

196 on the amount of overlap in the expression patterns of states belonging to different pairs. This  
 197 highlights the importance of the proportion of expressed genes; i.e., the sparseness of the state  
 198 vectors. If these vectors are very sparse, then they are unlikely to be non-orthogonal, therefore the  
 199 number of learnable embryo-adult pairs is quite large. The number of learnable pairs is a decreasing  
 200 function of sparseness, because the numerous non-orthogonal state vectors and the largely different  
 201 gene expressions in the adult states lead to several conflicts among them. Regarding the effect of  
 202 system size on functionality, the results are in line with the expectations; the higher the number of  
 203 genes, the higher is the number of “error free” developmental pathways (Fig 3).

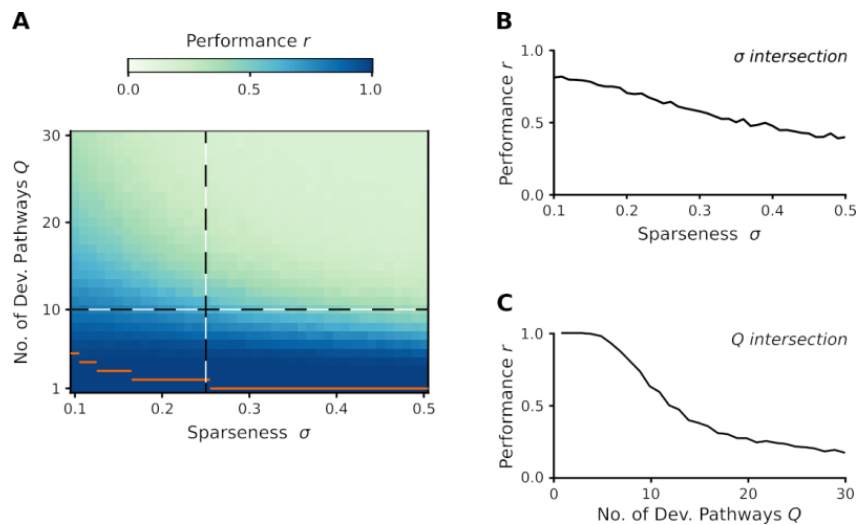

204 **Fig. 2. Performance of the analytic developmental networks.** We assumed different sparseness  
 205 (proportion on non-zero entries in the state vectors) values and different number of embryo-adult  
 206 pairs. Embryo and desired adult vectors were generated by independently setting each vector  
 207 element to high or low randomly according to the sparseness value. The performance was measured  
 208 by the averaged (over 400 realizations) Pearson correlation(s) between the desired and the  
 209 experienced adult state(s) for all developmental pathways (panel A). Panels B and C show a more  
 210 detailed view for the two cross-sections of the parameter space (indicated by dashed lines in panel  
 211 A). Orange horizontal lines show the maximum number of orthogonal state vectors for the given  
 212 sparseness values. Parameters:  $N = 100, \delta = 0.2, \tau = 1, \omega = 25$ .



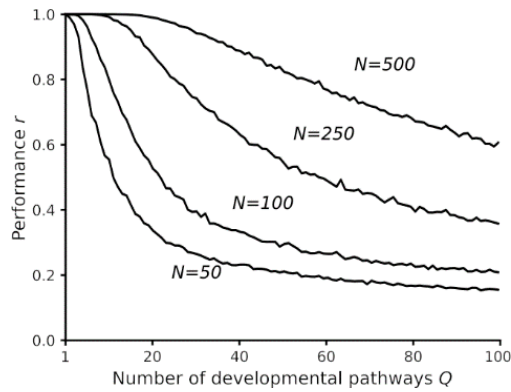

213 **Fig. 3. Performance of the analytic developmental networks with different number of genes**  
 214 **and developmental pathways.** Relevant parameters as in Fig. 2 and  $\sigma = 0.1$ .

215 **A key question** is whether a functional network is attainable by Darwinian selection via a  
 216 series of mutation-selection steps. In our evolutionary model we used **a more realistic Darwinian**  
 217 **dynamics than the solitary stochastic hill climbing** [11]. From the viewpoint of the theory of  
 218 artificial neural networks this process can be regarded as a **Darwinian dynamics-driven learning**  
 219 **process**. The evolutionary algorithm yields interaction matrices that contain positive and negative  
 220 values where the heuristic formulation predicts them (Fig 4). While the individual interaction  
 221 matrices vary, their average is in line with the heuristically derived matrix. The values are arranged  
 222 into a characteristic structure; positive and negative entries form horizontal stripes, intermitted with  
 223 vertical stripes of near-zero values (c.f. Fig 1). Those genes have the largest effect on the  
 224 developmental process, which are expressed in any embryonic or adult states (c.f. marked columns  
 225 in Fig 4). Depending on whether the affected gene is expressed in any of the adult states, they have  
 226 a strong positive or negative effect (c.f. marked rows in Fig 4). The rest of the genes drift freely in  
 227 individual realizations due to a lack of selective pressure. Consequently, the average values in these  
 228 positions are approximately zero (c.f. grey columns in left panel of Fig 4). The corresponding  
 229 values in the analytic treatment (undefined elements) are zero by definition. The only major  
 230 difference from the heuristic matrix is that the main diagonal elements of the evolutionary matrix

231 are mainly negative, which means that the expression of every gene **is under negative feedback by**  
 232 **its own inhibitory product.** A possible explanation is that without a strong negative feedback a gene  
 233 **could be easily overexpressed due to the perturbations of the interaction** elements. This is more  
 234 probable if the sparseness of the expression vectors is low, as it was in our case. This picture is  
 235 likely to change **with hierarchical developmental regulation, the evolution of which takes longer**  
 236 **time and should be investigated in the future.**

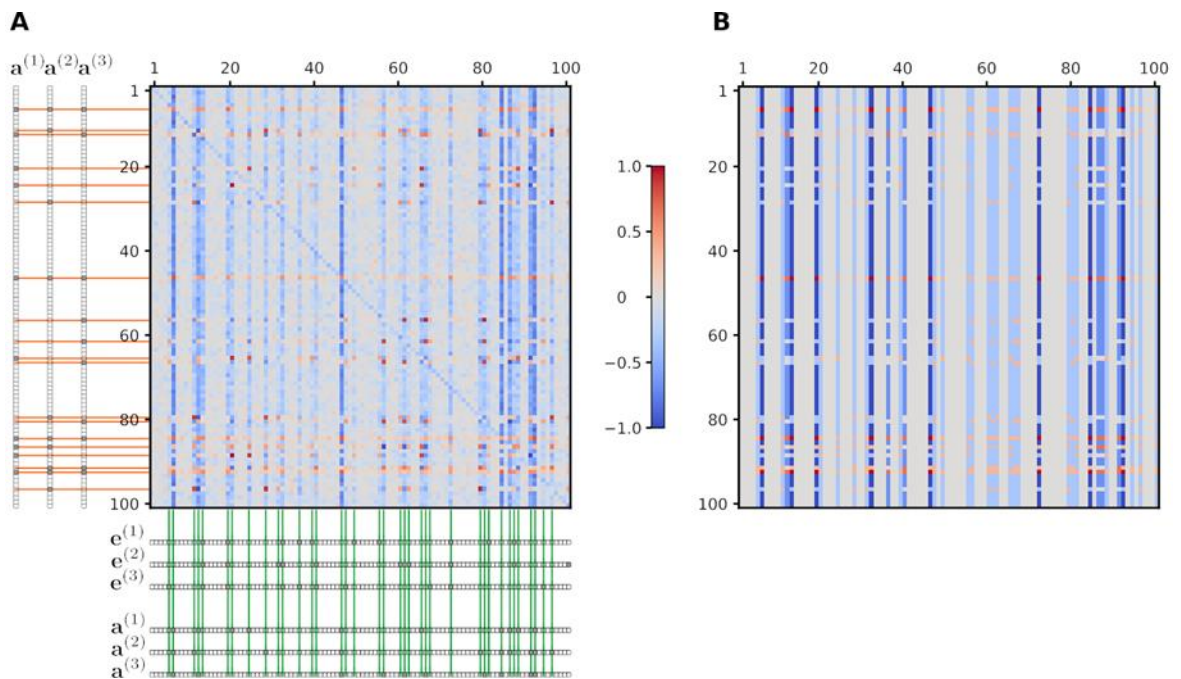

237 **Fig. 4. Structure of the interaction matrix obtained with the evolutionary algorithm as**  
 238 **compared to the analytically derived one for three developmental pathways.** (A) The  
 239 evolutionary interaction matrix was obtained by averaging the output of 300 independent runs of  
 240 the evolutionary algorithm. The three applied environment-specific embryonic and adult state  
 241 vectors are shown along the sides. Orange guidelines highlight those rows where the corresponding  
 242 genes are expressed in at least one adult state, whereas green guidelines highlight those columns  
 243 where at least one gene is expressed in any of the embryonic or adult states. (B) The theoretically  
 244 predicted interaction matrix was constructed from the embryonic and adult state vectors using Eq.  
 245 (3). Parameters as in Fig. 2 and  $Q = 3, K = 100, \mu_W = 0.05, \mu_e = 0.1, \sigma = 0.1$ .

246 A detailed view of the evolutionary process is shown in Fig 5. During the early generations,  
 247 where the gene regulation is undeveloped, it takes many generations (i.e., mutation-selection steps)  
 248 to approach the environment-specific optimum. In addition, selection for one environment can have  
 249 adverse effects on performance in another environment if the basin of attraction of the actually  
 250 selected adult state engulfs the neighborhood of the embryonic states of other adult states. But those  
 251 interactions which are not beneficial **in all environments** are eliminated. **Detrimental** mutations  
 252 may arise any time also in a well-functioning system, but selection eliminates them over the  
 253 timescale of a few environmental changes.

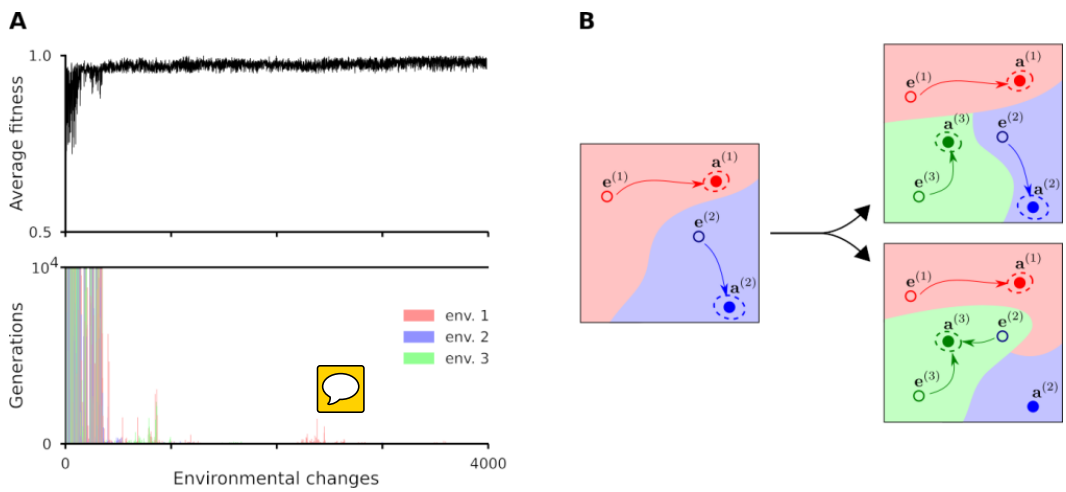

254 **Fig. 5. Learning of three different developmental pathways in the evolutionary model.** (A)  
 255 Average fitness and the mutation-selection steps needed to achieve a well-functioning  
 256 developmental network during random environmental changes. The three environments are  
 257 denoted by red, green and blue. Parameters as in Fig. 4. (B) Schematic illustration of the changes  
 258 in the state-space dynamics during the evolutionary process with three developmental pathways  
 259 (indicated by red, blue and green colors). The panels show the basins of attraction of an initial,  
 260 random regulation system with two embryo-adult pairs (left), a well-functioning one (top right)  
 261 and a bad one, where the basins of attraction of the adult states (filled dots encircled by dotted lines  
 262 indicating variation around the target phenotypes) include not only their corresponding embryo  
 263 states (bottom right).

264 A developmental process must be sufficiently robust against stochastic perturbations of  
265 both the embryonic state and the gene interaction matrix. It requires that the neighborhood  
266 (according to a given metric) of the embryonic states must also be in the basin of their  
267 corresponding adult states. Therefore, some inputs of variation should produce little or no  
268 phenotypic variation at all, a phenomenon that has received a lot of attention under the labels of  
269 canalization, robustness or buffering [26-28]. The recovery performance of the network changes  
270 with increasing amount of perturbations (Fig 6). The system is very robust against perturbations  
271 regarding the embryonic state, and it is moderately robust against both additive perturbations and  
272 eliminated interactions regarding the interaction network. **This robustness is attributable to the high**  
273 **number of neutral elements** (correspond to the zero values in state vectors) of the interaction matrix.  
274 **This is in sharp contrast to the standard Hebbian set-up, where there are no neutralities, due to the**  
275  **$\{-1, +1\}$  representation; see Table 1.** Resilience understandably decreases with the number of  
276 developmental pathways in all cases, but conforming to “graceful degradation” in artificial neural  
277 networks; i.e., performance first decreases mildly and drops fast only beyond a critical strength of  
278 perturbation [24]. To sum up, variation is apportioned into discontinuous (basins of attraction) and  
279 continuous (small perturbations around the target) phenotypes (Fig 5B). **Evo-devo mainly focus on**  
280 **the first kind of variation whereas standard evolutionary genetics focus on the second** [15, 29].

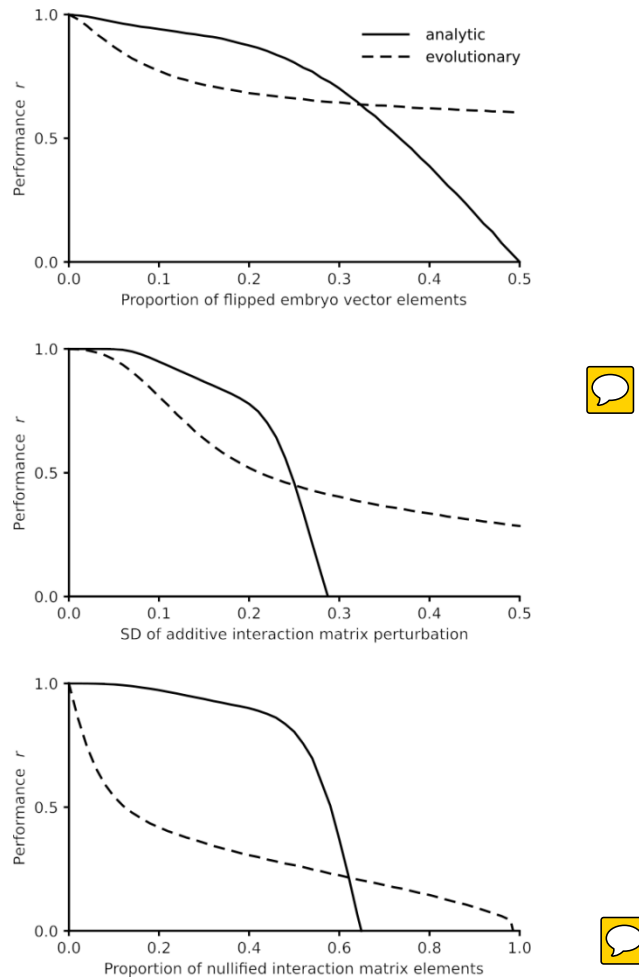

281 **Fig. 6. Robustness of the developmental dynamics against perturbations.** The interaction  
 282 matrices were constructed from the given number of embryo-adult vector pairs according to Eq.  
 283 (4). The performance was expressed by the Pearson correlation(s) between the desired and the  
 284 experienced adult state(s) for all developmental pathways after  $T=150$  iterations averaged over 300  
 285 matrices and 100 perturbations for each parameter combination. (A) Performance against the  
 286 proportion of the flipped embryonic vector elements. (B). Performance against the standard  
 287 deviation ( $SD$ ) of the perturbation of the interaction matrix. All elements of the matrix were  
 288 perturbed additively by an  $N(0, SD)$  random number. (C) Performance against the proportion of  
 289 nullified elements of the interaction matrix. Each element of the interaction matrix was set to zero  
 290 with the given probability. Relevant parameters are as in Fig. 4.

## 291 **Discussion**

292 Treating gene regulatory networks as formally analogous to artificial neural networks [21,  
293 22] allows translating the well-known dynamics of the latter [30] to model genomic programs for  
294 development. There is widespread natural variation in morphogenic pathways [31], and the  
295 developmental memory of past selected phenotypes [11] is akin to the memory capacity of neural  
296 networks. This developmental memory allows populations to re-evolve phenotypes much faster  
297 than it would be possible if they had to evolve de novo. Previous speculation on **the role** of the  
298 heat-shock protein Hsp90 as a capacitor for releasing hidden morphogenetic variation that could  
299 allow fast morphological radiations [31] has been criticized on the grounds that **the function** of  
300 Hsp90 is to prevent morphological aberrations. Furthermore, some sense of purposive evolution,  
301 fully incompatible with the lack of foresight of natural selection, lays behind this sort of  
302 interpretations [32].

303 These criticisms do not apply here because in our developmental model past selected states  
304 can recur in the population if they appear useful again in a different environment or body context.  
305 As any theoretical model, ours obviously has inherent limitations and highly simplifies the  
306 representation of biological systems. However, to the extent that it captures sufficient conditions  
307 to generate the phenomenon of morphological radiations, more complex explanations are not  
308 required. Thus, the assumption that structural novelties (or “key innovations”) are associated with  
309 adaptive radiations into new ecological niches (e.g. [33, p. 159]) might be unwarranted. There is a  
310 noteworthy implication in the foregoing consideration for the understanding of atavism.  
311 Crocodylian teeth can grow in mutant birds, which suggests the reactivation of the associated  
312 developmental machinery [34], that required the resurrection [35] of a key aspect of regulation.  
313 The same neurons participate in the storage of different engrams in neural networks. The same

314 holds for the storage of devo-engrams in genetic regulatory networks. Resurrection leading to  
315 atavism requires only limited reactivation of a few connections in a network that is maintained by  
316 the current selective forces. An exciting question is how evo-devo learning can generalize from the  
317 “training set” (previously selected target phenotypes) to novel ones [11, 36]. Prediction [36] is that  
318 generalization potential works within a set that can be characterized by the same formal grammar.

319 While the theory of neural networks can (and does) infer the same conclusions based on  
320 different representations, in the case of modelling real biological situations the adequacy of the  
321 representation can be crucial (the same holds for neuronal networks). Our results show that a linear  
322 change to the representation has profound impact on the essential features of the system. While in  
323 the customary (neural)  $\{-1,+1\}$  representation there are no neutral elements in the interaction  
324 matrix, the biologically adequate  $\{0,+1\}$  representation of genetic regulatory networks allows for  
325 the free choice of interaction elements being opposite to “0”. This feature turns out to increase the  
326 robustness of the system against the disturbance of interaction coefficients. Another feature of our  
327 representation is the large number of different interaction matrices entailing the same  
328 developmental process, thus evolution “from scratch” does not face so many constraints.

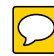

329 **Acknowledgements**

330 The authors thank Ferenc Jordán and Harold. P. de Vladar for comments on an earlier draft. A.S.  
331 and E.S. are supported by the National Research, Development and Innovation Office (NKFIH)  
332 under OTKA grant numbers K124438 (A.S.), K119347 (E.S. and A.S.) and GINOP-2.3.2-15-2016-  
333 00057 (E.S., P.S. and A.S.) research grants; A.S. was supported by the Bolyai János Research  
334 Fellowship of the Hungarian Academy of Sciences and the ÚNKP-19-4 New National Excellence  
335 Program of the Ministry of Human Capacities. M.S. is supported by the MTA Distinguished Guest  
336 Fellowship Programme in Hungary. All authors are supported by Templeton Foundation under  
337 grant number TWCF0268 (“Learning in evolution, evolution in learning”). The authors declare no  
338 competing interests. All the computer files employed in this study will be available upon  
339 acceptance.



## References

1. Turing AM. The chemical basis of morphogenesis. *Philos Trans R Soc B*. 1952; 237:37-72.
2. Watson RA, Szathmáry E. How Can Evolution Learn? *Trends Ecol Evol*. 2016; 31:147-157.
3. Sharov AA. Evolutionary constraints or opportunities? *Biosystems*. 2014; 123:9-18.
4. Müller GB, Wagner GP. Novelty in evolution: Restructuring the concept. *Annu Rev Ecol Syst*. 1991; 22:229-256.
5. Peterson T, Müller GB. What is evolutionary novelty? Process versus character based definitions. *J Exp Zool (Mol Dev Evol)*. 2013; 320B:345-350.
6. Linares M. The ghost of mimicry past: laboratory reconstitution of an extinct butterfly 'race'. *Heredity*. 1997; 78:628-635.
7. Orgogozo V. Replaying the tape of life in the twenty-first century. *Interface Focus*. 2015; 5:20150057.
8. Blount ZD, Lenski RE, Lossos JB. Contingency and determinism in evolution: Replaying life's tape. *Science*. 2018; 362: eaam5979.
9. Muschick M, Indermaur A, Salzburger W. Convergent evolution within an adaptive radiation of cichlid fishes. *Curr Biol*. 2012; 22:2362-2368.
10. Salzburger W. Understanding explosive diversification through cichlid fish genomics. *Nat Rev Genet*. 2018; 19:705-717.
11. Watson RA, Wagner GP, Pavlicev M, Weinreich DM, Mills R. The evolution of phenotypic correlations and “developmental memory”. *Evolution*. 2014; 68:1124-1138 (2014).
12. Conway Morris S. *Life's solution. Inevitable humans in a lonely universe*. Cambridge university press, 2003.
13. Kouvaris K, Clune J, Kounios L, Brede M, Watson RA. How evolution learns to generalise: Using the principles of learning theory to understand the evolution of developmental organisation. *PLoS Comput Biol*. 2017; 13:e1005358.
14. Murray JD. *Mathematical Biology*, 2nd ed. Springer, 1993.
15. Alberch P. Developmental constraints in evolutionary processes. In: *Evolution and development*. Dahlem Konferenzen 1982, Bonner JT, ed. Springer-Verlag, 1982, pp 313-332.

16. Gjuvsland AB, Vik JO, Beard DA, Hunter PJ, Omholt SW. Bridging the genotype–phenotype gap: what does it take? *J Physiol*. 2013; 591:2055-2066.
17. Meier JI, Marques DA, Mwaiko S, Wagner CE, Excoffier L, Seehausen O. Ancient hybridization fuels rapid cichlid fish adaptive radiations. *Nat Commun*. 2017; 8:14363.
18. Seehausen O, Koetsier E, Schneider MV, Chapman LJ, Chapman CA, et al. Nuclear markers reveal unexpected genetic variation and a Congolese-Nilotic origin of the Lake Victoria cichlid species flock. *Proc R Soc Lond B Biol Sci*. 2003; 270:129-137.
19. Greenwood PH. Towards a phyletic classification of the ‘genus’ *Haplochromis* (Pisces, Cichlidae) and related taxa. Part 1. *Bull Br Mus Nat Hist Zool*. 1979; 35:265-322.
20. Levine M, Davidson EH. Gene regulatory networks for development. *Proc Natl Acad Sci USA*. 2005; 102:4936-4942.
21. Vohradsky J. Neural model of the genetic network. *J Biol Chem*. 2001; 276:36168-36173.
22. Vohradsky J. Neural network model of gene expression. *FASEB J*. 2001; 15:846-854.
23. Hirahara M. "Associative memory" in *Encyclopedia of Neuroscience*. Binder MD, Hirokawa N, Windhorst U, eds. Springer, 2009, pp 195-201.
24. Rolls ET. *Memory, attention and decision-making*. Oxford university press, 2008.
25. Treves A. Graded-response neurons and information encodings in autoassociative memories. *Phys Rev A*. 1990; 42:2418-2430.
26. Waddington CH. Canalization of development and the inheritance of acquired characters. *Nature*. 1942; 150:563-565.
27. Nijhout HF. The nature of robustness in development. *Bioessays*. 2002; 24:553-563.
28. Hallgrímsson B, Greena RM, Katz DC, Fish JL, Bernier FP, et al. The developmental-genetics of canalization. *Sem Cell Dev Biol*. 2019; 88:67-79.
29. Müller GB. Evo-devo: extending the evolutionary synthesis. *Nat Rev Genet*. 2007; 8:943-949.
30. Haykin S. *Neural networks: a comprehensive foundation*, 2nd ed. Pearson Education, 1999.
31. Rutherford SL, Lindquist S. Hsp90 as a capacitor for morphological evolution. *Nature*. 1998; 396:336-342.
32. Dickinson WJ, Seger J. Cause and effect in evolution. *Nature*. 1999; 399:30.
33. Carroll SB, Grenier JK, Weatherbee SD. *From DNA to diversity. Molecular genetics and the evolution of animal design*, 2nd ed. Blackwell, 2005.

34. Harris MP, Hasso SM, Ferguson MWJ, Fallon JF. The development of Archosaurian first-generation teeth in a chicken mutant. *Curr Biol.* 2006; 16:371-377.
35. Marshall CR, Raff EC, Raff RA. Dollo's law and the death and resurrection of genes. *Proc Natl Acad Sci USA.* 1994; 91:12283-12287.
36. Parter M, Kashtan N, Alon U. Facilitated variation: how evolution learns from past environments to generalize to new environments. *PLoS Comput Biol.* 2008; 4:e1000206.
